# Supplementary material
Source: Springer Nature journal article supplement (https://www.springermedizin.de/resource/supplementary/12992_2013_205_MOESM1_ESM.pdf/9616686)
Supplement: MOESM1 [file 9616686]

Box 1– Activities carried out by CHWs in the Brazilian Family Health Strategy<sup>1</sup>

|               | Area                                 | Specific Activities                                                                                                                                                                                                                                                                                      |
|---------------|--------------------------------------|----------------------------------------------------------------------------------------------------------------------------------------------------------------------------------------------------------------------------------------------------------------------------------------------------------|
| Primary Care  | Chronic Disease Management           | Supporting adherence to medications for diabetes and hypertension<br>Early identification of symptoms and signs of chronic disease and referral into the family health unit<br>Design, organize and deliver group education meetings for individuals with chronic disease e.g. diabetes and hypertension |
|               | Triage                               | Low level referral support to ensure appropriate use of primary care services<br>Early identification of clinical problems and referral into the family health unit<br>Support with appointment booking, call/recall.                                                                                    |
|               | Clinical Care                        | Use of Integrated Management of Childhood Illness decision support tool to identify children at risk of serious illness                                                                                                                                                                                  |
|               | Social Determinants                  | Identification of household determinants of ill health and health seeking behaviour                                                                                                                                                                                                                      |
|               | Vertical Disease Programmes          | TB DOTS service support providing daily home visits                                                                                                                                                                                                                                                      |
|               | Healthy Pregnancy /Child development | Ensure early booking and healthy lifestyle during pregnancy<br>Antenatal consultation support<br>Design, organize and deliver low-risk pregnancy health education groups<br><b>Monthly or bimonthly weight measurement in all children less than 2 years of age</b>                                      |
| Public Health | Screening                            | Improve uptake in cervical and breast screening through identification of target groups and signposting                                                                                                                                                                                                  |
|               | Immunizations                        | Identification of children with incomplete vaccine schedules and referral into the GP practice                                                                                                                                                                                                           |
|               | Breastfeeding support                | Peer support for breastfeeding providing one-to-one advice in the household<br>Design, organize and deliver group education meetings for breast-feeding mothers                                                                                                                                          |
|               | Health Promotion                     | Delivery directly into the household of healthy lifestyle messages such as stop smoking, hand hygiene, weight loss, healthy diet and physical exercise with referral and signposting where appropriate                                                                                                   |
|               | Health Protection                    | Contact tracing for common infectious diseases e.g. typhoid fever<br>Household risk assessment and advice for vector-transmitted disease e.g. dengue fever                                                                                                                                               |
|               | Household data collection            | Monthly collection and update of basic household data on occupancy, socio-demographic data, education levels, occupation, deprivation and predominant health issue including smoking and alcohol use of every member in each household                                                                   |
| Community     | Health education groups              | Includes but not limited to breastfeeding support, diabetes, hypertension, low-risk pregnancy and immunizations health education groups                                                                                                                                                                  |
|               | Planning and performance             | Engaging with the community to ensure health services are satisfactory and appropriate in their design and delivery                                                                                                                                                                                      |
|               | Community Liaison                    | Acting as a liaison between the health service and community leaders<br>Acting as a community leader                                                                                                                                                                                                     |
